# Supplementary material for: Effect of Ionizing Radiation on the Chemical Structure and the Physical Properties of Polycaprolactones of Different Molecular Weight
Source: PubMed Central journal article supplement (PMC6415462; doi:10.3390/polym10040397), 2018-04-03

# Effect of Ionizing Radiation on the Chemical Structure and the Physical Properties of Polycaprolactones of Different Molecular Weight

Rodrigo Navarro <sup>1</sup>, Guillermina Burillo <sup>2</sup>, Esbaide Adem <sup>3</sup> and Angel Marcos-Fernández <sup>1,\*</sup>

<sup>1</sup> Instituto de Ciencia y Tecnología de Polímeros (CSIC), Juan de la Cierva 3, 28006 Madrid, Spain; rnavarro@ictp.csic.es

<sup>2</sup> Instituto de Ciencias Nucleares, Universidad Nacional Autónoma de México, Circuito Exterior, Ciudad Universitaria, 04510 Ciudad de México, México; burillo@nucleares.unam.mx

<sup>3</sup> Instituto de Física, Universidad Nacional Autónoma de México, Circuito Exterior, Ciudad Universitaria, 04510 Ciudad de México, México; esbaide@fisica.unam.mx

\* Correspondence: amarcos@ictp.csic.es; Tel.: +34-912-587-555

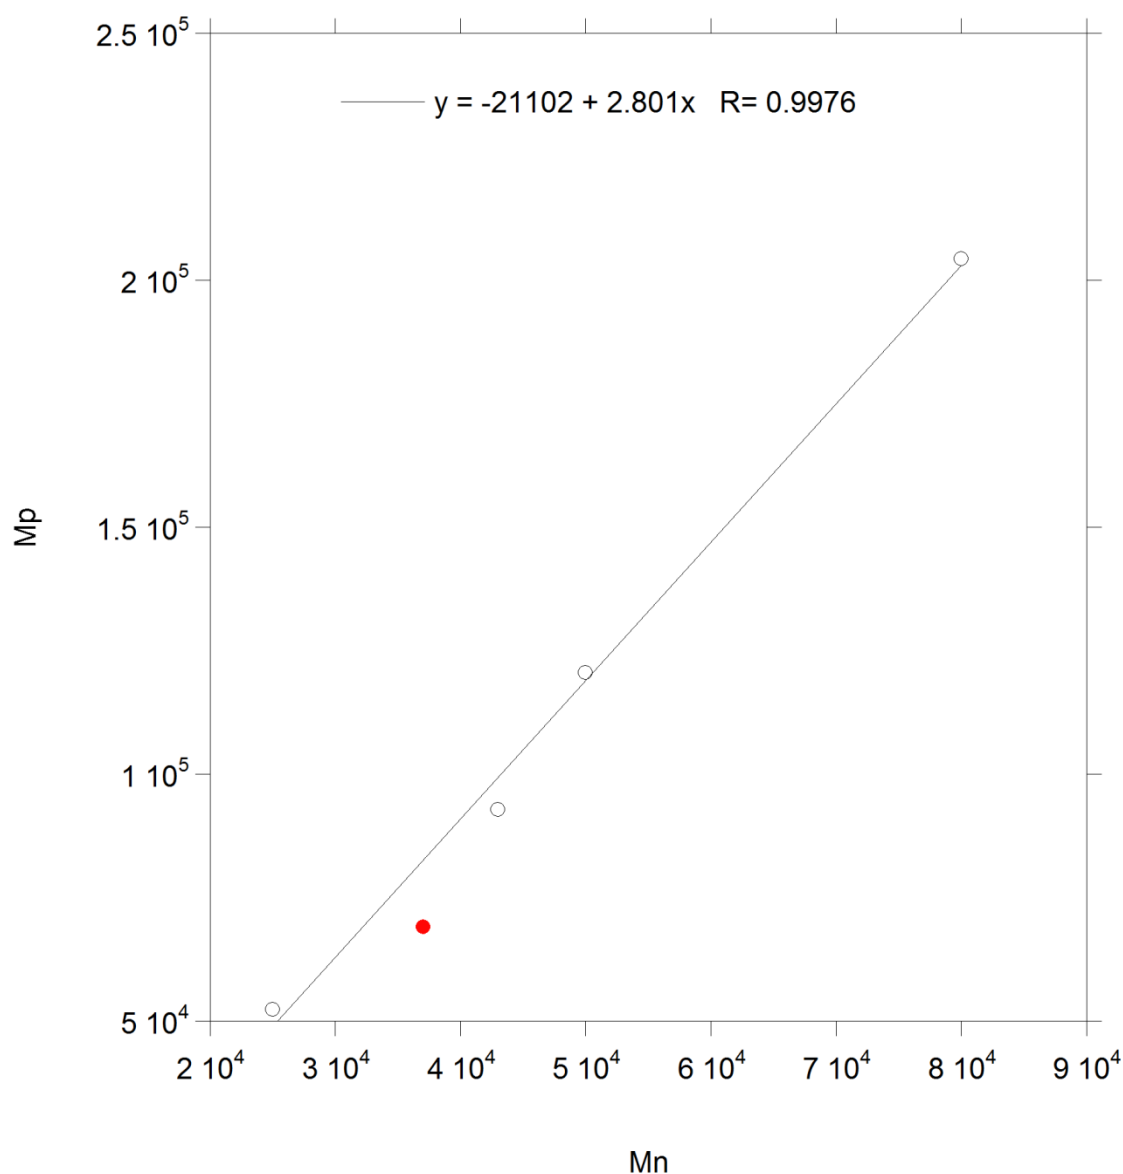

**Figure S1.** Molecular weight in the peak maximum ( $M_p$ ) of the size exclusion chromatography (SEC) curve vs molecular weight as reported by the supplier ( $M_n$ ) of polycaprolactones.

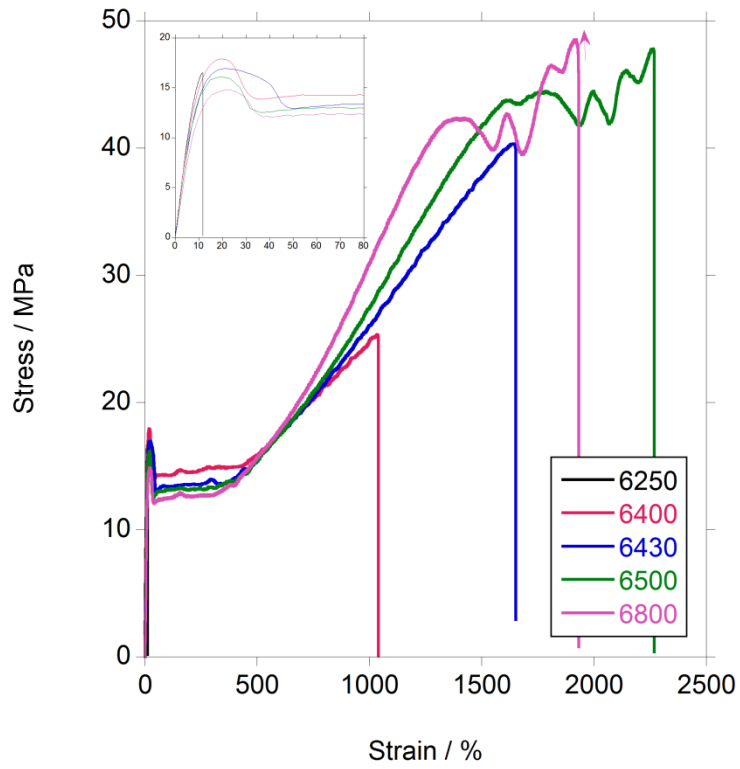

Figure S2. Tensile stress-strain curves for the polycaprolactones.

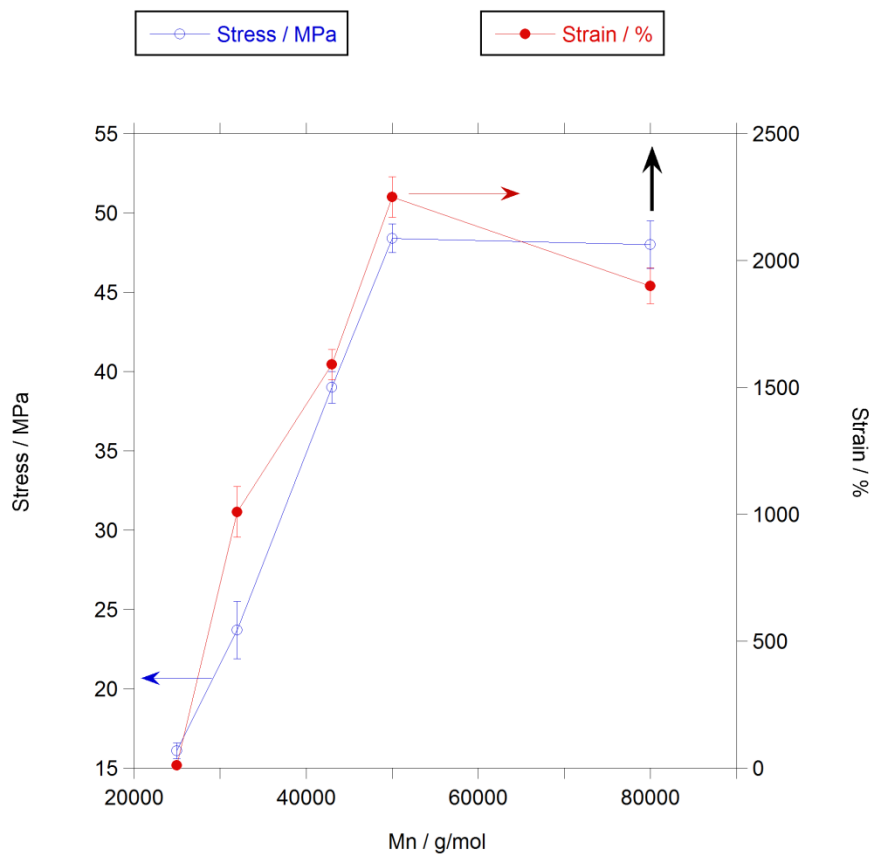

Figure S3. Tensile stress and strain results for the polycaprolactones.

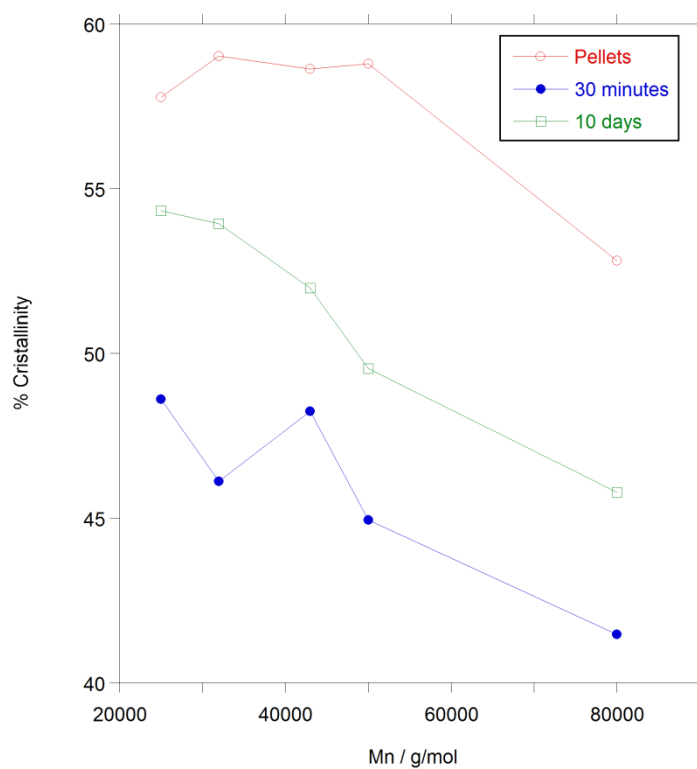

**Figure S4.** Crystallinity percentage for the polycaprolactones in the pellets and after recrystallization from the melt for 30 min and 10 days.

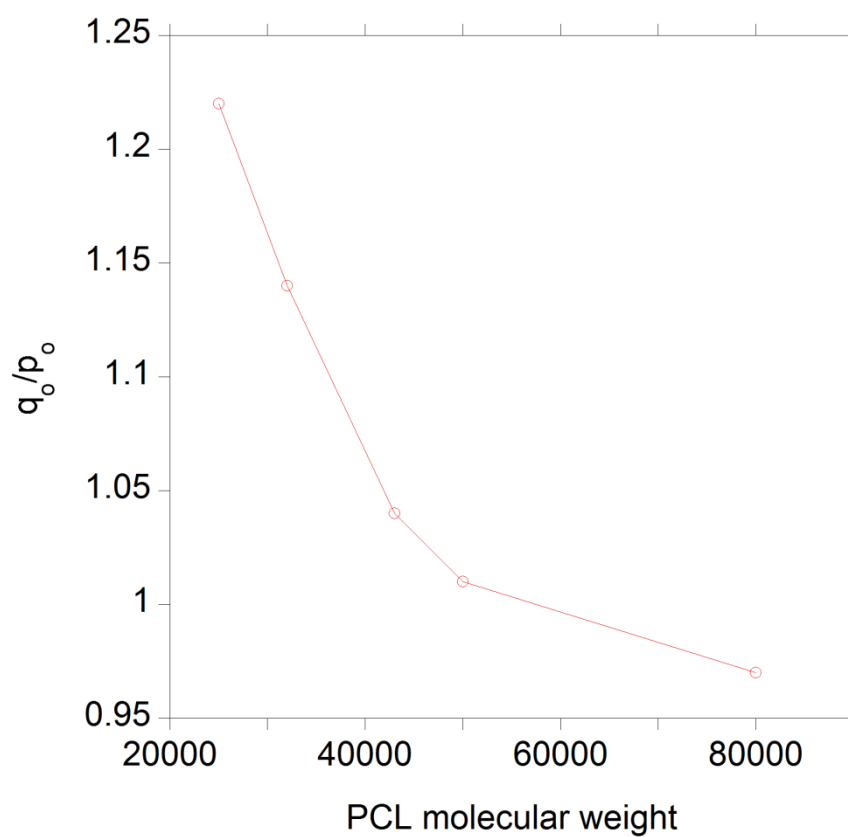

**Figure S5.** Calculated crosslink efficiency ( $q_0/p_0$ ) vs PCL molecular weight.

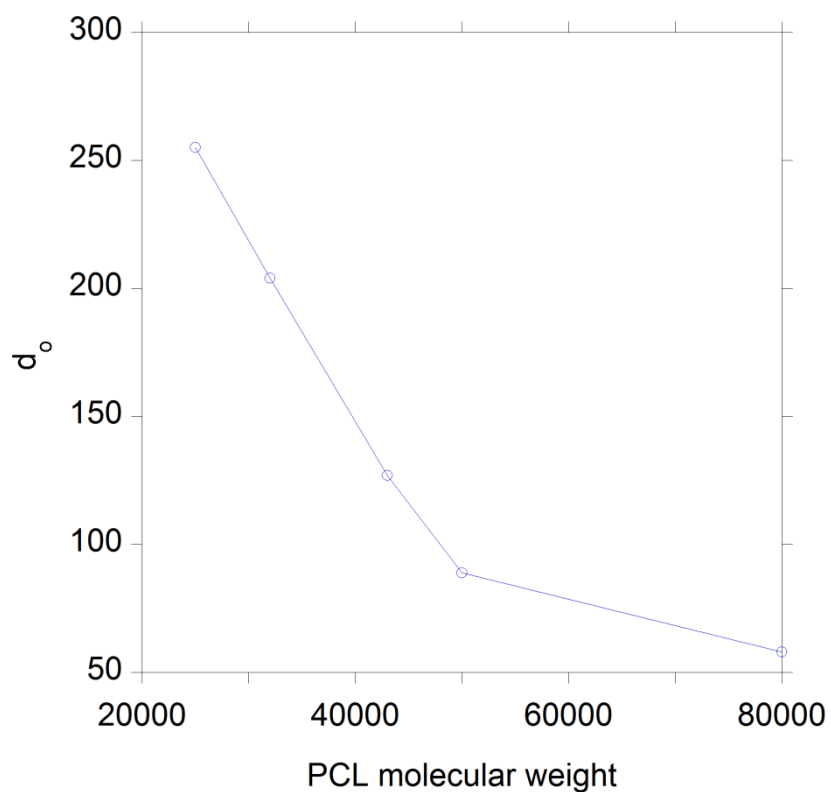

Figure S6. Calculated minimum dose for gelation ( $d_0$ ) vs PCL molecular weight.

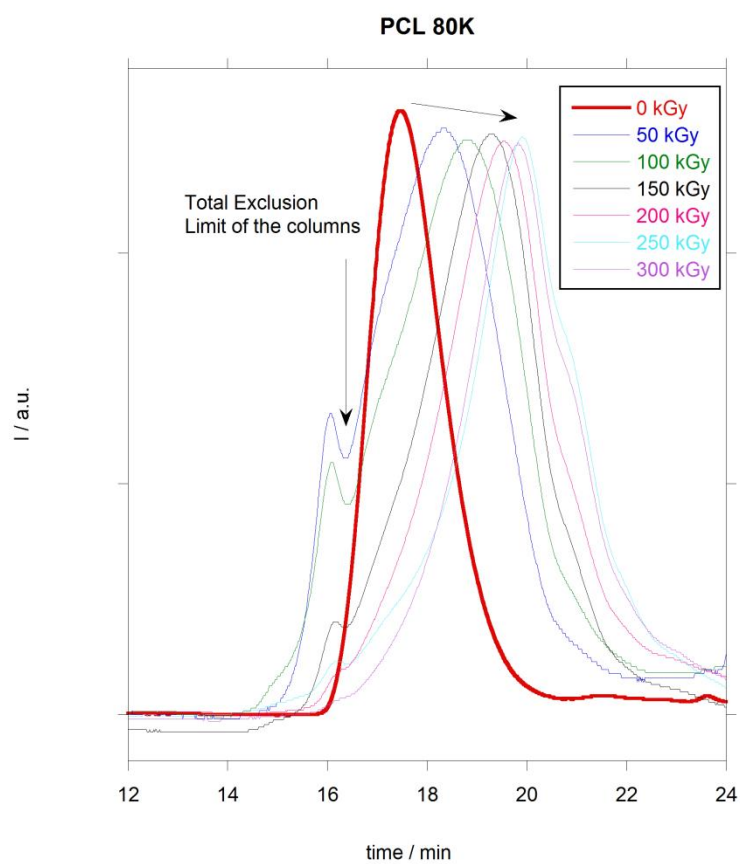

Figure S7. SEC curves for PCL 80 K.

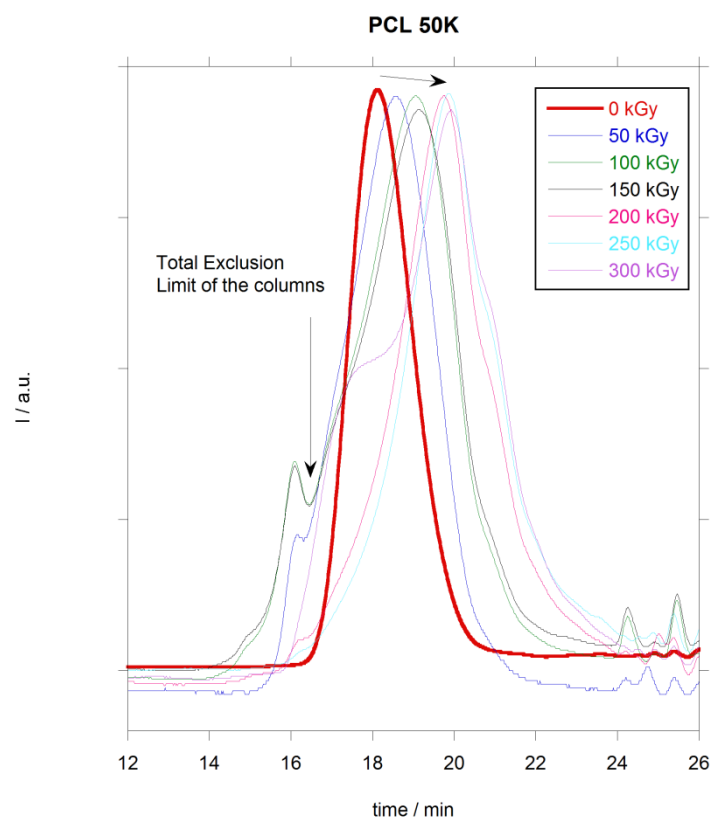

**Figure S8.** SEC curves for PCL 50 K.

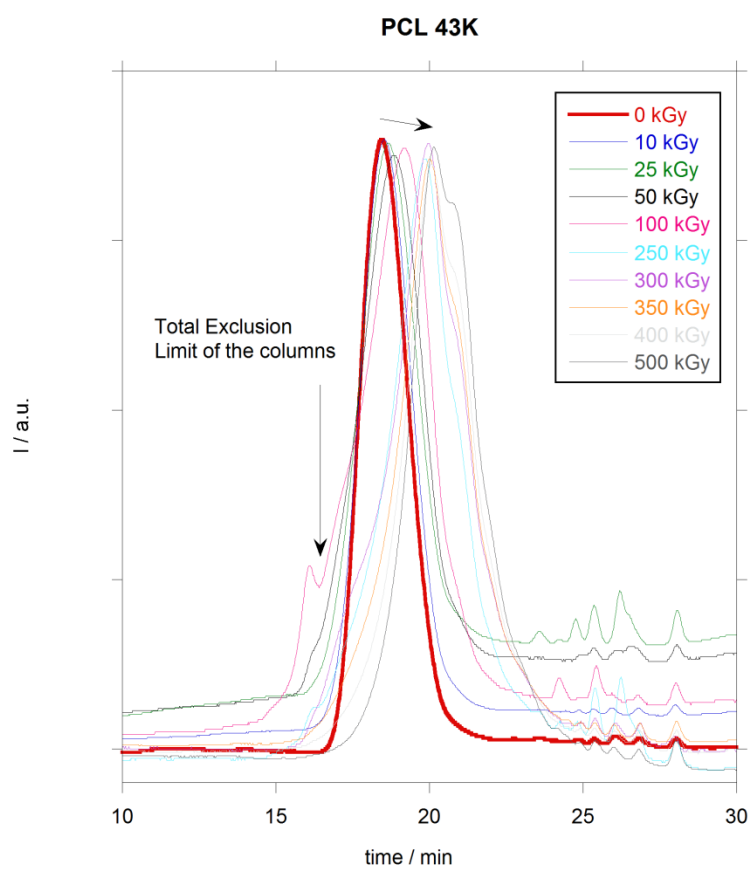

**Figure S9.** SEC curves for PCL 43 K.

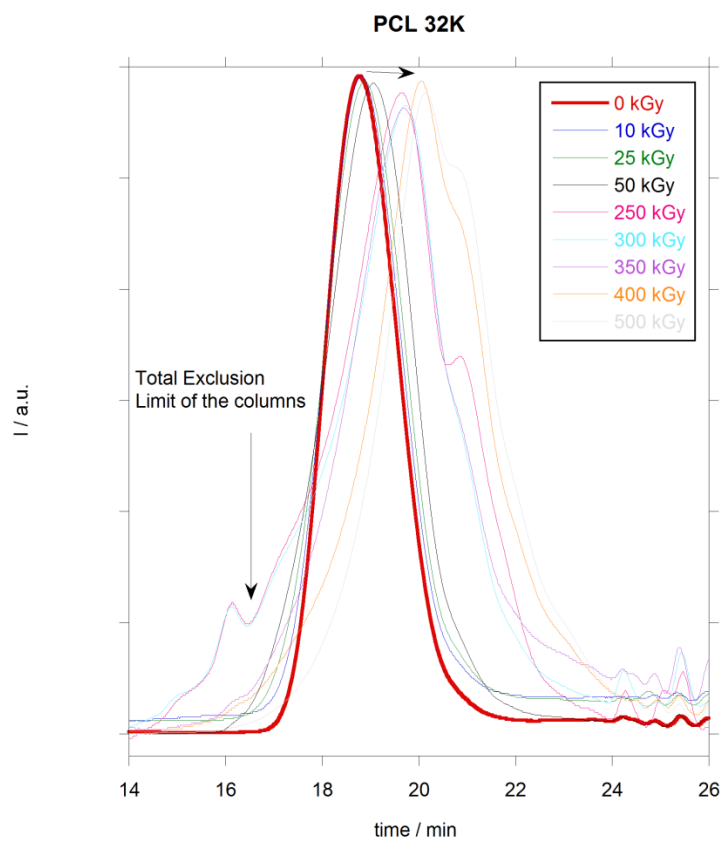

**Figure S10.** SEC curves for PCL 32 K.

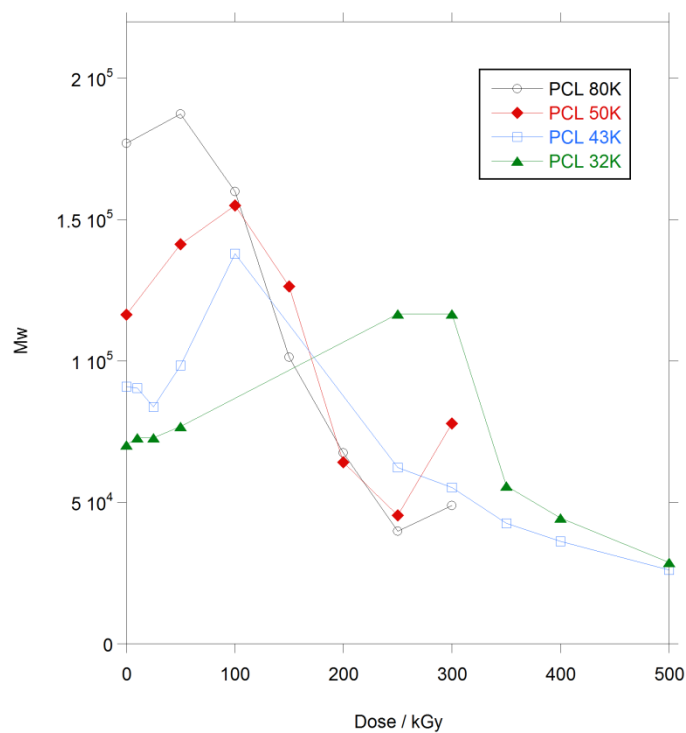

**Figure S11.** Weight average molecular weight ( $M_w$ ) vs dose for the irradiated PCLs.

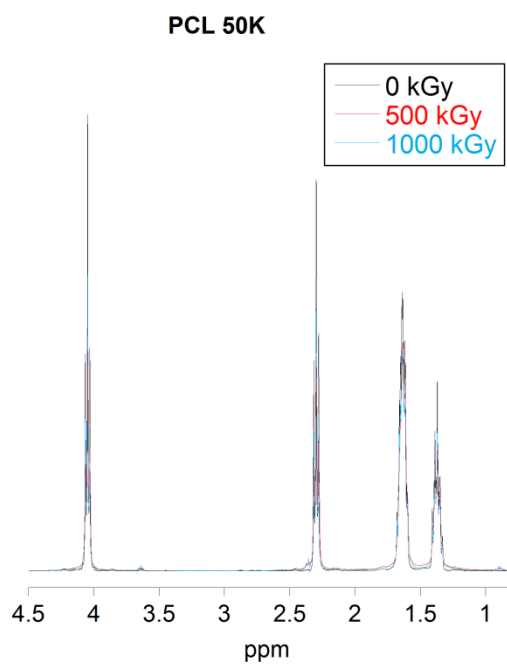

**Figure S12.** Proton nuclear magnetic resonance (NMR) spectra for PCL 50 K non irradiated (black line) and for the soluble part of the PCL 50 K irradiated at 500 (red line) and 1000 kGy (blue line).

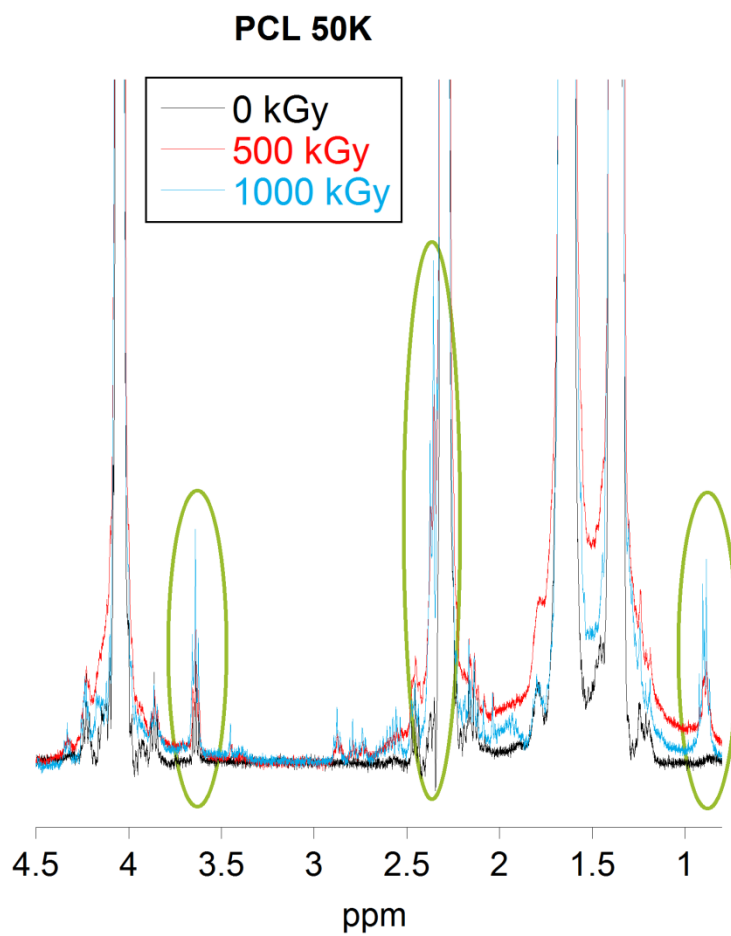

**Figure S13.** Expanded view of the spectra in Figure S12.

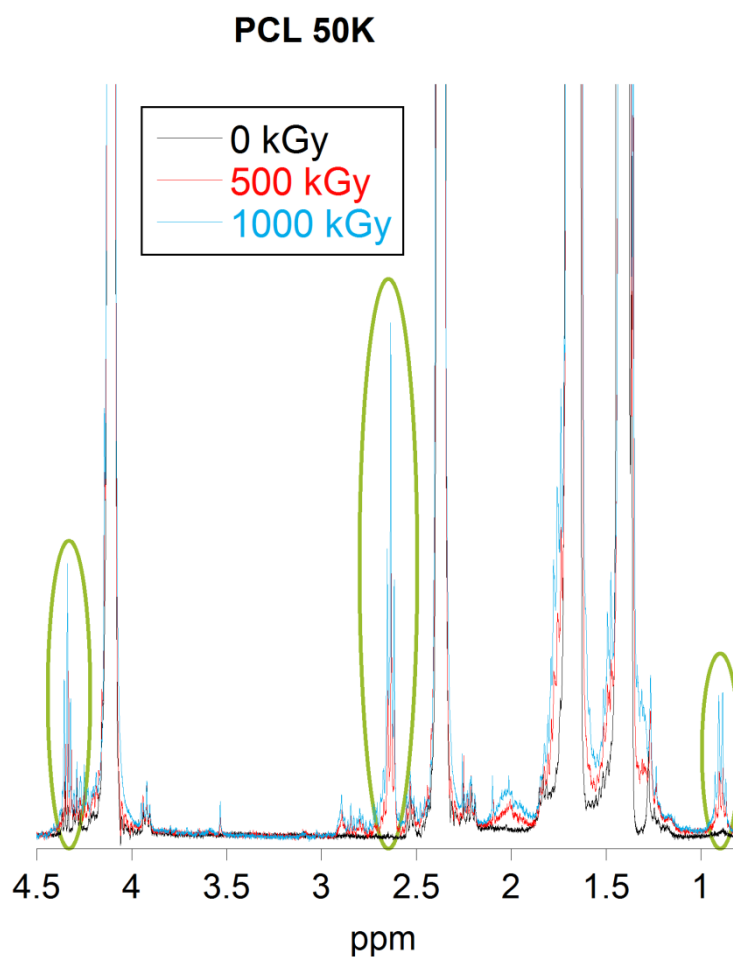

**Figure S14.** Proton NMR spectra for PCL 50 K non irradiated (black line) and for the soluble part of the PCL 50 K irradiated at 500 (red line) and 1000 kGy (blue line) derivatized with trifluoroacetic anhydride.

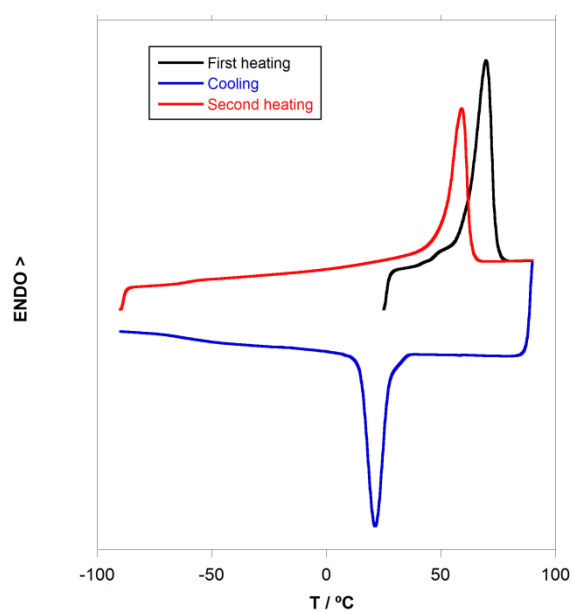

**Figure S15.** Differential Scanning Calorimetry (DSC) traces for PCL 80 K irradiated with electron beam at a dose of 200 kGy.



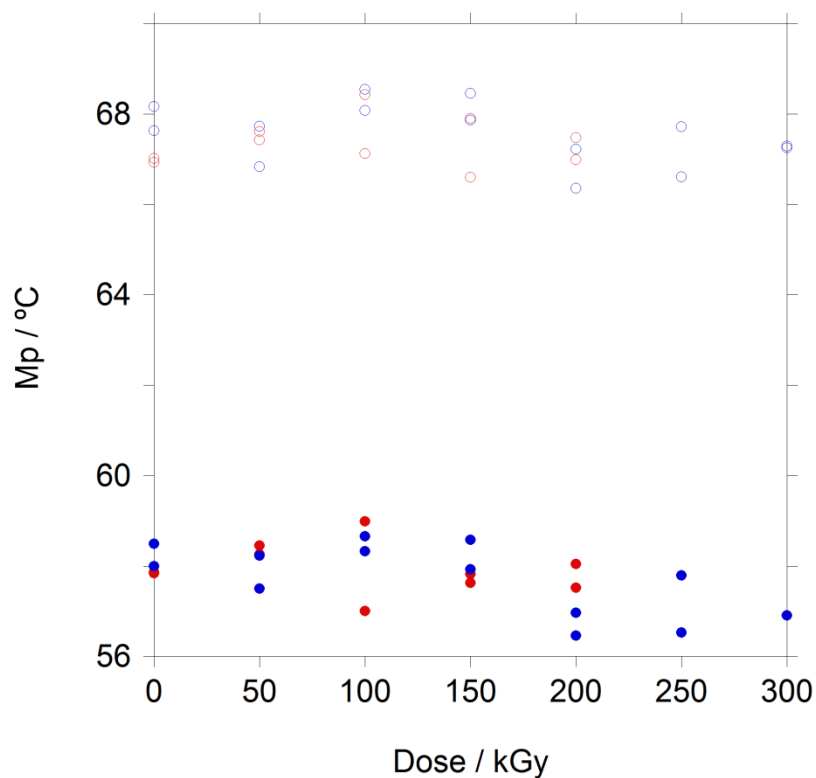

**Figure S16.** Melting point ( $M_p$ ) for PCL 50 K (in red) and for PCL 80 K (in blue) in the first heating run (open symbols) and in the second heating run (filled symbols).

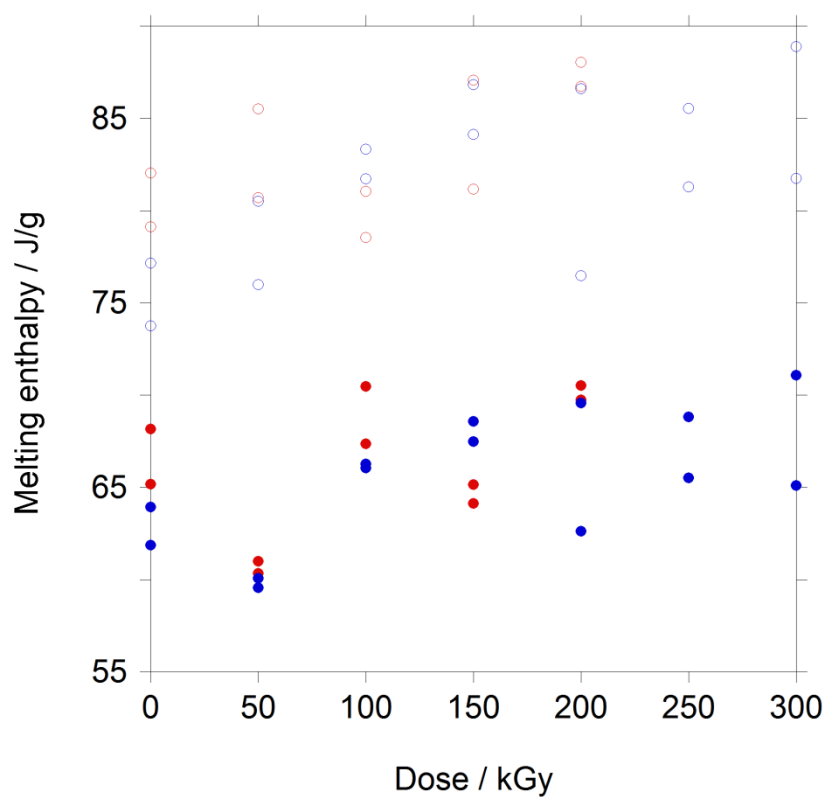

**Figure S17.** Melting enthalpy for PCL 50 K (in red) and for PCL 80 K (in blue) in the first heating run (open symbols) and in the second heating run (filled symbols).

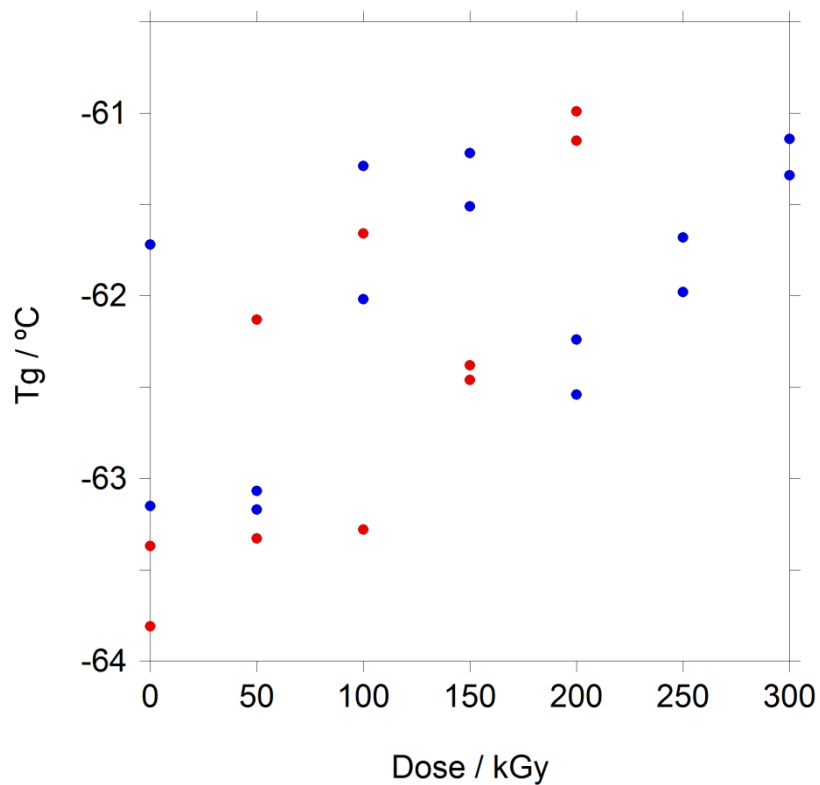

Figure S18. Glass transition temperature ( $T_g$ ) for PCL 50 K (in red) and for PCL 80 K (in blue).

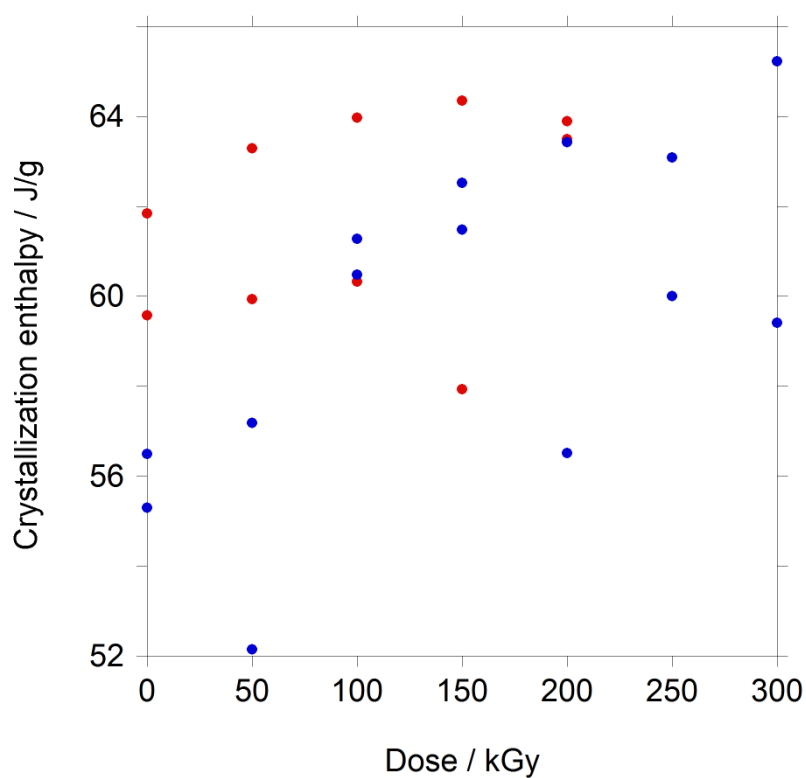

Figure S19. Crystallization enthalpy for PCL 50 K (in red) and for PCL 80 K (in blue).

**Table S1.** Values for tensile stress at break ( $T_s$ ) and strain at break ( $\epsilon_b$ ) of PCLs when irradiated with electron beam at several doses.

| Dose<br>(kGy) | PCL 32 K       |                     | PCL 43 K       |                     | PCL 50 K       |                     | PCL 80 K       |                     |
|---------------|----------------|---------------------|----------------|---------------------|----------------|---------------------|----------------|---------------------|
|               | $T_s$<br>(MPa) | $\epsilon_b$<br>(%) | $T_s$<br>(MPa) | $\epsilon_b$<br>(%) | $T_s$<br>(MPa) | $\epsilon_b$<br>(%) | $T_s$<br>(MPa) | $\epsilon_b$<br>(%) |
| 0             | 23.7 ± 1.8     | 1010 ± 100          | 39.0 ± 1.0     | 1590 ± 60           | 48.4 ± 0.9     | 2250 ± 80           | 48.0* ± 1.5    | 1900* ± 70          |
| 10            | 18.3 ± 0.4     | 44 ± 13             | 33.5 ± 0.7     | 1360 ± 30           |                |                     |                |                     |
| 25            | 18.5 ± 0.5     | 29.5 ± 1.1          | 30.4 ± 1.1     | 1250 ± 60           |                |                     |                |                     |
| 50            | 18.3 ± 1.1     | 20 ± 3              | 20.4 ± 1.1     | 800 ± 60            | 37 ± 2         | 1410 ± 90           | 46 ± 2         | 1660 ± 100          |
| 100           |                |                     | 18.9 ± 0.7     | 46 ± 17             | 27 ± 2         | 1090 ± 70           | 43 ± 2         | 1460 ± 100          |
| 150           |                |                     |                |                     | 18.6 ± 0.5     | 610 ± 40            | 34 ± 3         | 1200 ± 80           |
| 200           |                |                     |                |                     | 18.6 ± 0.2     | 44 ± 12             | 17.9 ± 0.5     | 600 ± 50            |
| 250           |                |                     |                |                     | 18.3 ± 0.1     | 21.4 ± 1.9          | 17.4 ± 0.2     | 300 ± 200           |

\* Samples escaped from the grips.

**Table S2.** Values for tensile stress at break ( $T_s$ ) and strain at break ( $\epsilon_b$ ) of PCLs when irradiated with gamma rays at several doses.

| Dose<br>(kGy) | PCL 32 K       |                     | PCL 43 K       |                     | PCL 50 K       |                     | PCL 80 K       |                     |
|---------------|----------------|---------------------|----------------|---------------------|----------------|---------------------|----------------|---------------------|
|               | $T_s$<br>(MPa) | $\epsilon_b$<br>(%) | $T_s$<br>(MPa) | $\epsilon_b$<br>(%) | $T_s$<br>(MPa) | $\epsilon_b$<br>(%) | $T_s$<br>(MPa) | $\epsilon_b$<br>(%) |
| 0             | 23.7 ± 1.8     | 1010 ± 100          | 39.0 ± 1.0     | 1590 ± 60           | 48.4 ± 0.9     | 2250 ± 80           | 48.0* ± 1.5    | 1900* ± 70          |
| 25            | 18.3 ± 0.4     | 48 ± 15             | 30 ± 2         | 1240 ± 90           | 42 ± 3         | 1580 ± 130          | 47* ± 2        | 2070* ± 100         |
| 50            | 17.2 ± 0.2     | 13.5 ± 0.6          | 18.7 ± 0.4     | 630 ± 70            | 32 ± 2         | 1200 ± 60           | 48 ± 4         | 2100 ± 200          |
| 75            | 16.1 ± 0.9     | 10.2 ± 0.8          | 18.5 ± 0.3     | 50 ± 20             | 24 ± 3         | 960 ± 130           | 44.8 ± 1.9     | 1630 ± 140          |
| 100           | 13.5 ± 0.9     | 7.6 ± 0.7           | 18.3 ± 0.7     | 24 ± 4              | 22.8 ± 0.7     | 950 ± 30            | 38 ± 5         | 1400 ± 200          |
| 150           |                |                     |                |                     | 16.7 ± 0.2     | 21 ± 3              | 21.3 ± 1.4     | 850 ± 80            |
| 200           | 10.6 ± 0.6     | 5.7 ± 0.4           | 14.9 ± 0.5     | 10.8 ± 0.4          | 16.4 ± 0.2     | 17 ± 3              | 16.8 ± 0.2     | 70 ± 40             |

\* Samples escaped from the grips.

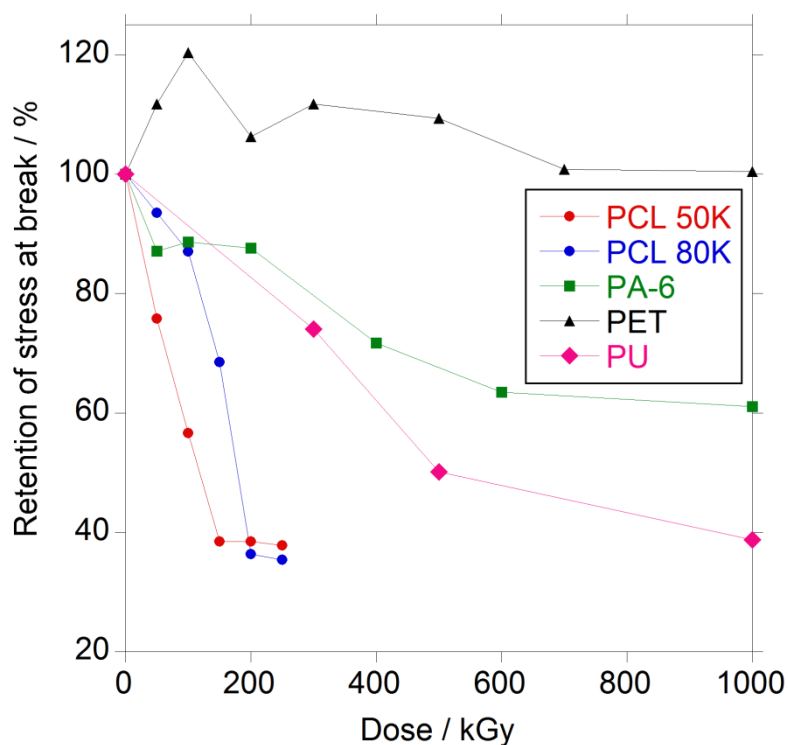

**Figure S20.** Retention of the stress at break vs dose for PCL 50 K (red circles), PCL 80 K (blue circles), PA-6 (green squares), PET (black triangles) and for an aliphatic polyurethane (magenta diamonds).

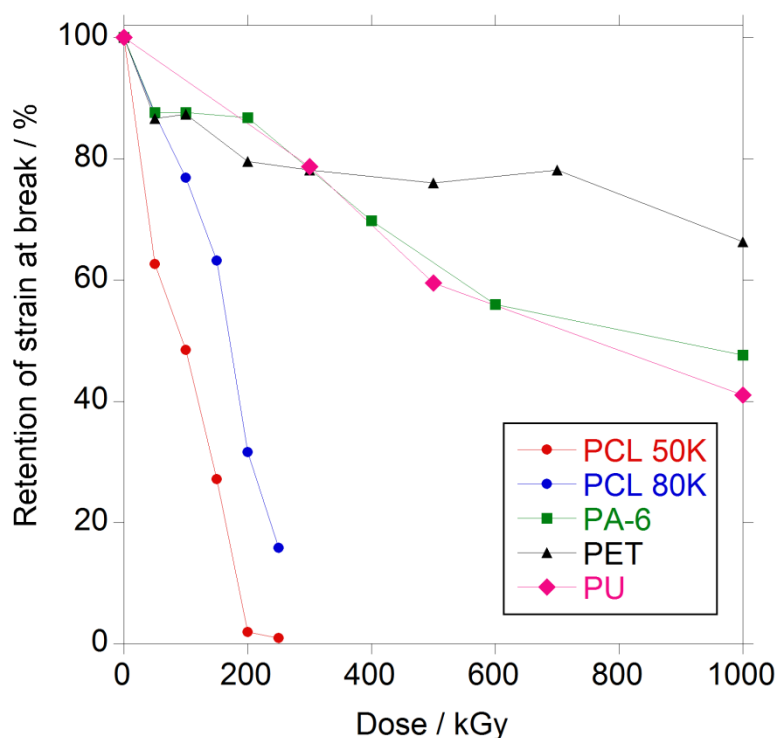

**Figure S21.** Retention of the strain at break vs dose for PCL 50 K (red circles), PCL 80 K (blue circles), PA-6 (green squares), PET (black triangles) and for an aliphatic polyurethane (magenta diamonds).

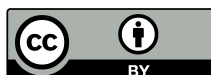

Supplement: polymers-10-00397-s001.pdf [file polymers-10-00397-s001.pdf]
